# Supplementary material
Source: PubMed Central journal article supplement (PMC6238652)
Supplement: Supp_Fig1.pdf [file Supp_Fig1.pdf]

## Supplementary Data

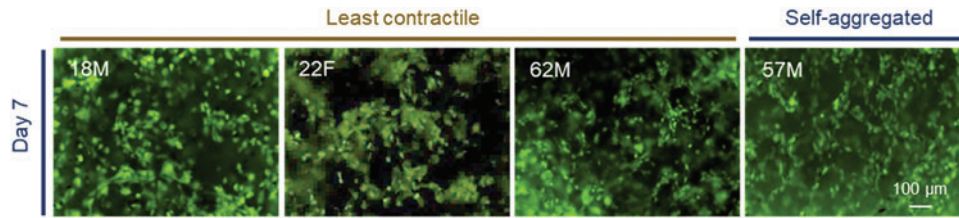

**SUPPLEMENTARY FIG. S1.** Viability in HA gels from different donors at 1 week. (Scale bar=100 μm). HA, hyaluronic acid.
