# Supplementary material
Source: PubMed Central journal article supplement (PMC6238652)
Supplement: Supp_Fig2.pdf [file Supp_Fig2.pdf]

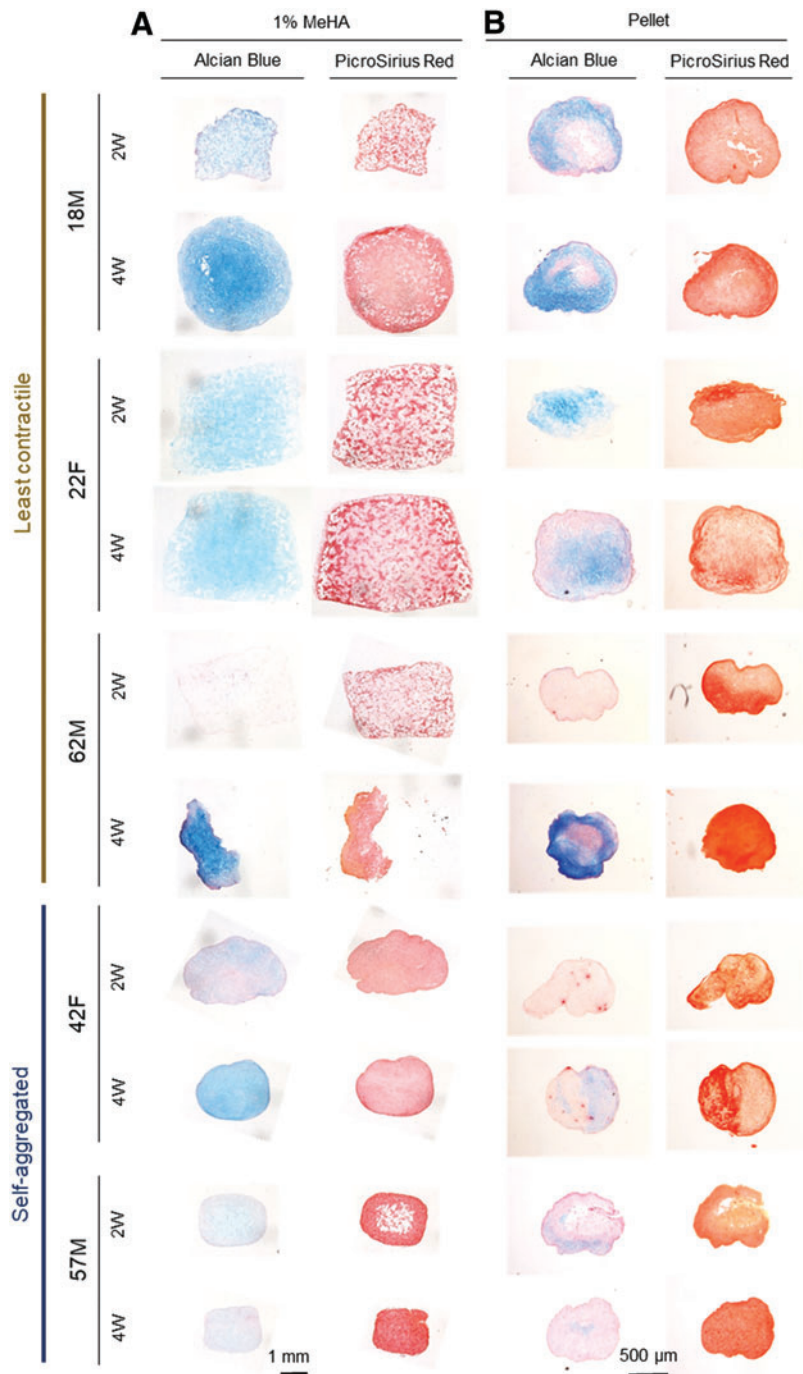

**SUPPLEMENTARY FIG. S2.** Macroscopic images of histological sections of hMSC-laden 1% MeHA constructs and pellets. Alcian blue and Picrosirius red staining of hMSC-laden 1% MeHA constructs (A) and pellets (B) at 2 and 4 weeks (scale bars = 1 mm [HA gel] and 500 μm [pellet], respectively). hMSC, human mesenchymal stem cell; MeHA, methacrylated hyaluronic acid.
