# Supplementary material
Source: PubMed Central journal article supplement (PMC6238652)
Supplement: Supp_Fig3.pdf [file Supp_Fig3.pdf]

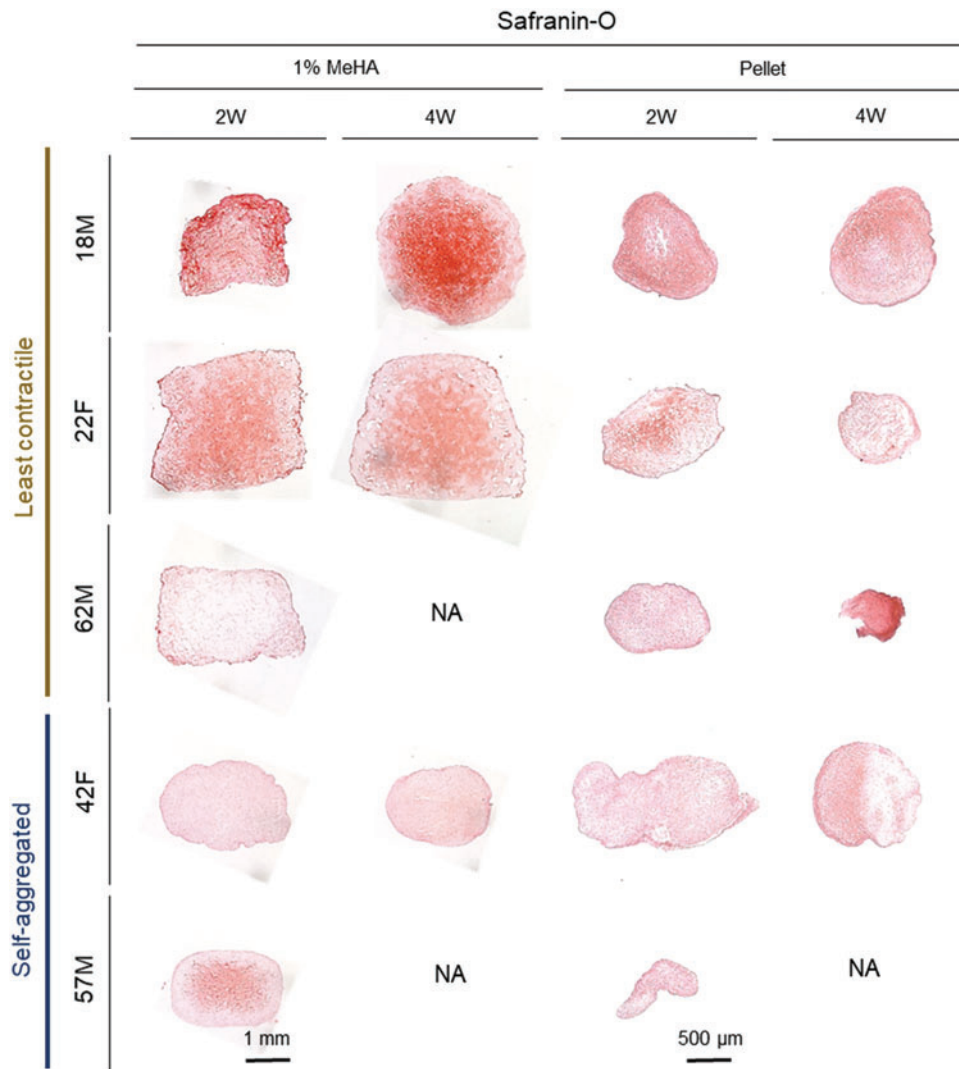

**SUPPLEMENTARY FIG. S3.** Macroscopic images of Safranin O stained sections of hMSC-laden MeHA constructs (*left*) and pellets (*right*) at 2 and 4 weeks (scale bars = 1 mm [HA gel] and 500 μm [pellet], respectively).
