# Supplementary material
Source: PubMed Central journal article supplement (PMC6238652)
Supplement: Supp_Fig4.pdf [file Supp_Fig4.pdf]

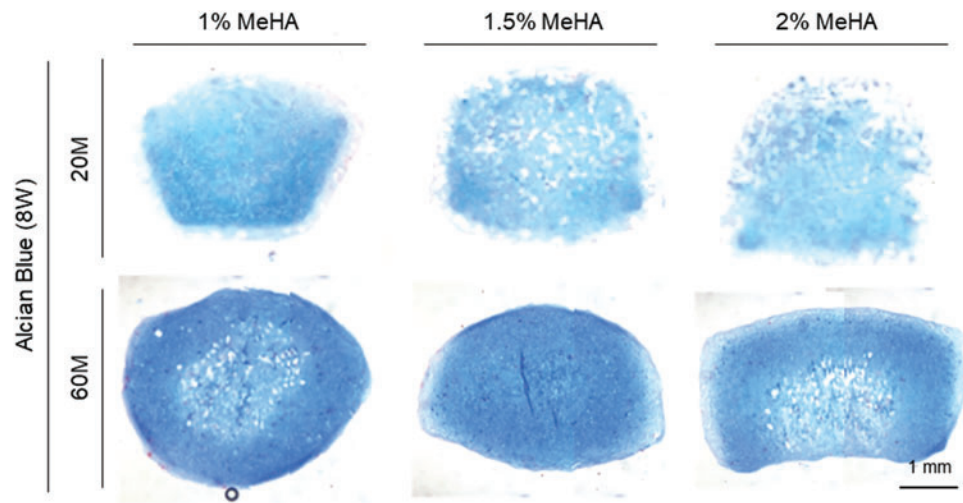

**SUPPLEMENTARY FIG. S4.** Macroscopic images of Alcian blue stained sections of hMSC-laden MeHA construct at 8 weeks. 20 million cells/mL (*top*) and 60 million cells/mL (*bottom*) group; 1% (*left*), 1.5% (*middle*), and 2% (*right*) MeHA group (scale bar= 1 mm).
