# Supplementary material
Source: PubMed Central journal article supplement (PMC6238652)
Supplement: Supp_Fig5.pdf [file Supp_Fig5.pdf]

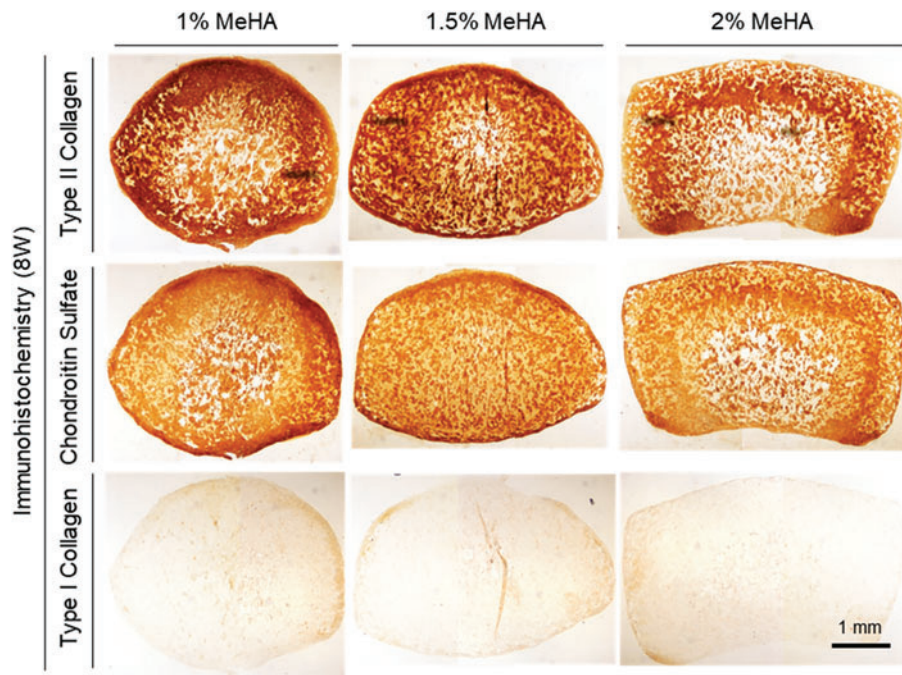

**SUPPLEMENTARY FIG. S5.** Macroscopic images of immunohistochemistry for type I and II collagen and chondroitin sulfate of hMSC-laden MeHA construct at 8 weeks.
